# Supplementary material
Source: HighWire-hosted journal article supplement (https://msystems.asm.org/content/2/2/e00184-16)

Figure S2

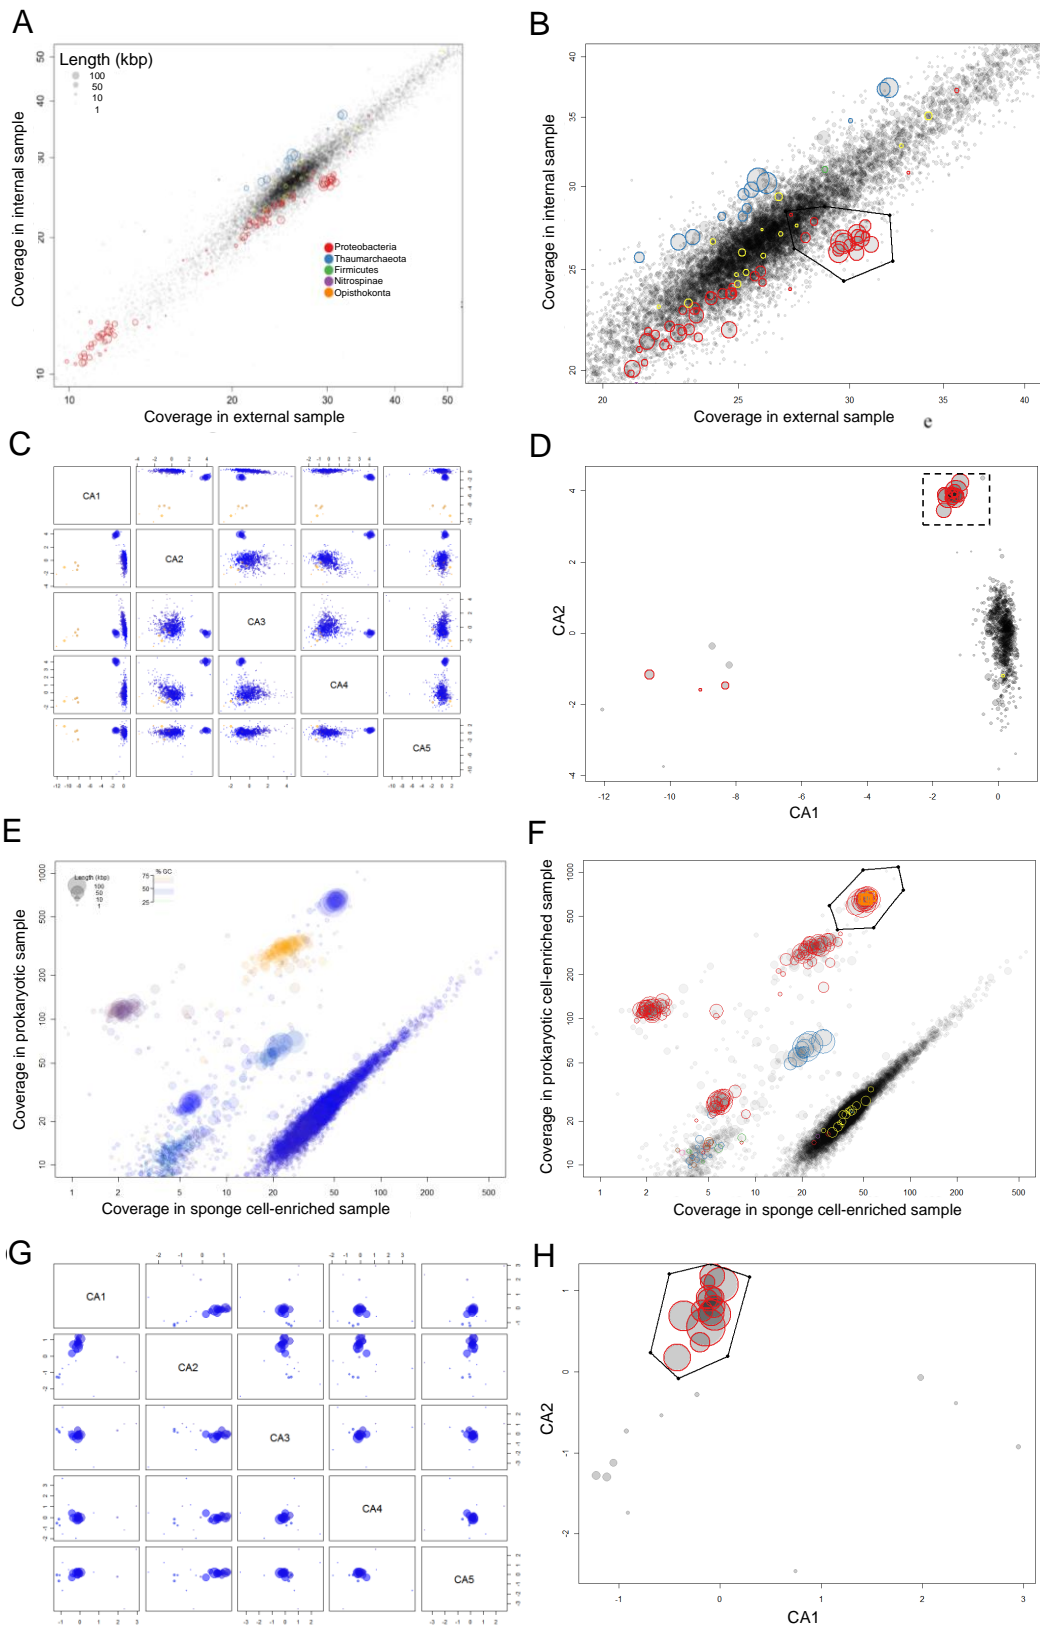

Supplement: inline-supplementary-material-3 [file inline-supplementary-material-3.pdf]
